# Supplementary material
Source: PubMed Central journal article supplement (PMC3149268)
Supplement: mmc1.pdf [file mmc1.pdf]

## Supporting Information

### Interaction strengths between the ribosome and tRNA at various steps of translocation

Chen-Yu Liu, Mohd Tanvir Qureshi and Tae-Hee Lee

#### Schematic drawing of the optical trap setup used for the rupture force measurements

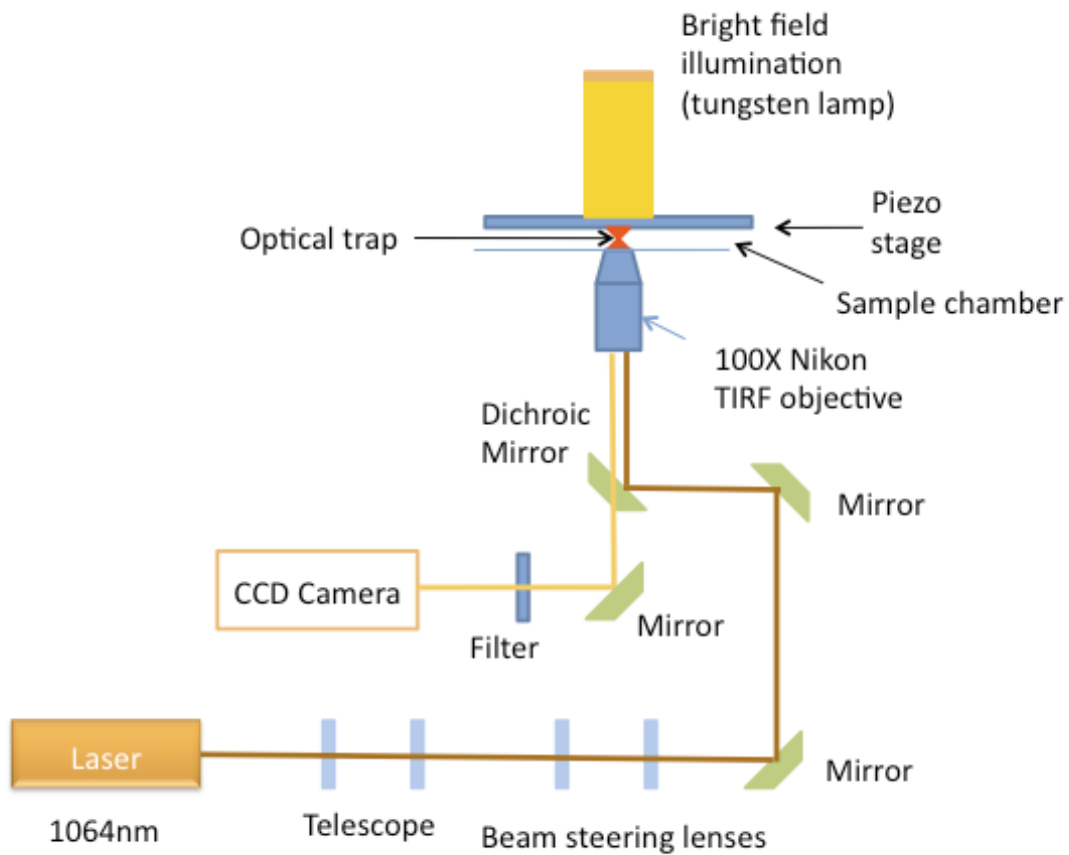

**A typical fluorescence image of surface immobilized ribosome complexes under the experimental conditions**

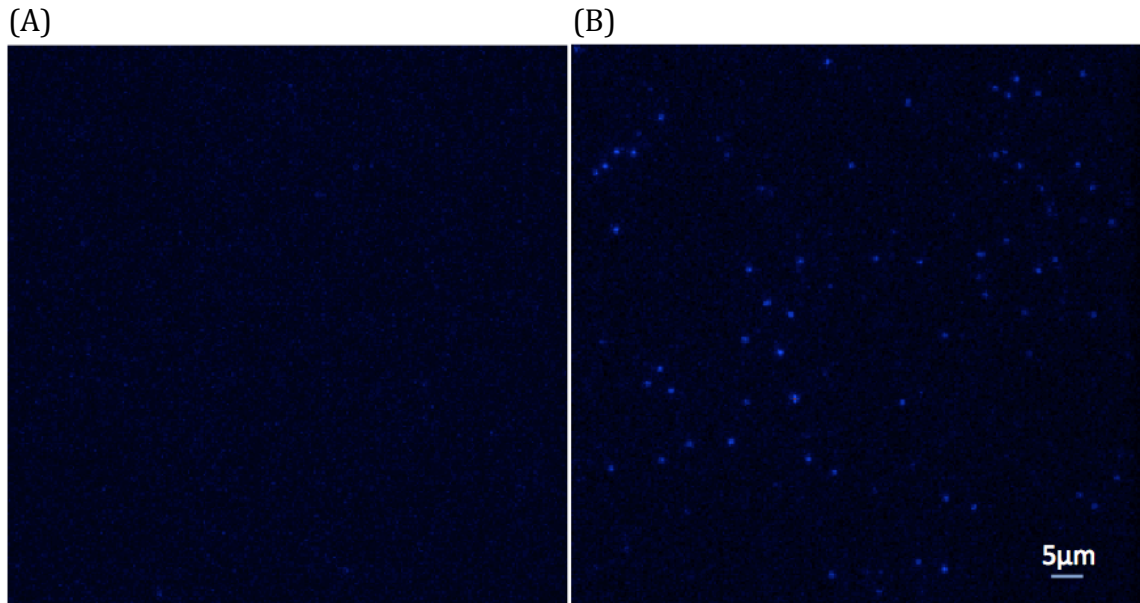

(A) A typical background fluorescence image before immobilizing the ribosome complexes on the surface.

(B) A typical fluorescence image of surface-immobilized ribosome complexes showing  $\sim 1$  complex /  $8 \times 8 \mu\text{m}^2$  surface area. The fluorescence is from Cy3 labeled fMet-tRNA<sup>fMet</sup> within the complex as previously published<sup>1</sup>.

**Reference**

(1) Mishra, P.; Qureshi, M. T.; Ren, W.; Lee, T.-H. Codon Dependent Fluctuations of tRNA Monitored with Fluorescence Polarization *Biophys J* **2010**, *99*, 3849-58.
